# Supplementary material for: Biofilm Formation by Staphylococcus aureus in the Specific Context of Cystic Fibrosis
Source: MDPI journal article supplement (doi:10.3390/ijms24010597), 2022-12-29
Supplement: s1 [file s1]

**Table S1: Data complementary to those given in Table 1 on patients, strains and biofilm evaluation for studies reviewed on biofilm formation by clinical strains of *S. aureus* isolated from patients with Cystic Fibrosis.**

| CF patients                                                        |                                                              |                                                                                                                                                   | S. aureus strains                                                       |                                                                     | Biofilm formation              |                                      |                                                      | Ref. |
|--------------------------------------------------------------------|--------------------------------------------------------------|---------------------------------------------------------------------------------------------------------------------------------------------------|-------------------------------------------------------------------------|---------------------------------------------------------------------|--------------------------------|--------------------------------------|------------------------------------------------------|------|
| Mean (x) or median (Me) age [range]                                | Gender male (M) or female (F)                                | Other infecting species                                                                                                                           | Sequence types (ST) or <i>spa</i> types (n)                             | Specimens                                                           | Period of S. aureus collection | Method of study of biofilm formation | Molecular mechanism(s) involved in biofilm formation |      |
| x: 23.6 y<br>[5-33] y                                              | M: 9<br>F: 9                                                 | NA                                                                                                                                                | ST228 (44), ST5 (5), ST247 (3), ST72 (1), ST235 (14), not typeable (26) | Sputum (88.2%), bronchial aspirates (9.6%), bronchial biopsy (2.2%) | 1996 to 2006                   | CV                                   | NA                                                   | [52] |
| NA                                                                 | NA                                                           | NA                                                                                                                                                | NA                                                                      | Deep tracheal aspirates                                             | 2008 to 2010                   | CV                                   | NA                                                   | [53] |
| x: 2.93<br>±0.2 y                                                  | M: 103<br>F: 80                                              | <i>P. aeruginosa</i> , <i>C. albicans</i> , <i>K. pneumoniae</i> , <i>E. cloacae</i> , <i>E. coli</i> , <i>S. marcescens</i> , <i>S. pyogenes</i> | NA                                                                      | Sputum                                                              | March 2015 to August 2017      | CV                                   | NA                                                   | [55] |
| NA                                                                 | NA                                                           | NA                                                                                                                                                | NA                                                                      | Sputum                                                              | NA                             | CV                                   | NA                                                   | [35] |
| NA                                                                 | NA                                                           | NA                                                                                                                                                | 8 different pulsotypes                                                  | Respiratory specimens                                               | NA                             | CV                                   | NA                                                   | [59] |
| <u>SCV positive patients:</u><br>Me: 24 y<br>[5- 53] y             | <u>SCV positive patients:</u><br>M: 15<br>F: 13              | <u>SCV positive patients:</u><br><i>P. aeruginosa</i> (75%)                                                                                       | NA                                                                      | Respiratory samples                                                 | NA                             | CV staining (w/v)                    | NA                                                   | [56] |
| <u>Normal phenotype positive patients:</u><br>Me: 23 y<br>[1-48] y | <u>Normal phenotype positive patients:</u><br>M: 12<br>F: 17 | <u>Normal phenotype positive patients:</u><br><i>P. aeruginosa</i> (37.9%)                                                                        |                                                                         |                                                                     |                                |                                      |                                                      |      |

Table S1 - Cont.

| CF patients                         |                               |                                                                                                                                            | <i>S. aureus</i> strains                                                                                     |                      |                                                  | Biofilm formation                         |                                                                                                                                                                            | Ref. |
|-------------------------------------|-------------------------------|--------------------------------------------------------------------------------------------------------------------------------------------|--------------------------------------------------------------------------------------------------------------|----------------------|--------------------------------------------------|-------------------------------------------|----------------------------------------------------------------------------------------------------------------------------------------------------------------------------|------|
| Mean (x) or median (Me) age [range] | Gender male (M) or female (F) | Other infecting species                                                                                                                    | Sequence types (ST) or <i>spa</i> typing (n)                                                                 | Specimens            | Period of <i>S. aureus</i> collection            | Method of study of biofilm formation      | Molecular mechanism(s) involved in biofilm formation                                                                                                                       |      |
| Me: 27.9 y [19-45] y                | M: 11<br>F: 3                 | <i>P. aeruginosa</i> : 6/14 patients chronically co-infected, not co-infected: 5/14 patients, new co-infection during study: 3/14 patients | Dominant <i>spa</i> types: t091, t1577, t008, t5430, t021, t166, t206, t034, t002, t617, t011, t003, t067    | Sputum               | 1-y observational prospective study              | CV                                        | NA                                                                                                                                                                         | [57] |
| x: 17.6 y [7-24] y                  | NA                            | Co-colonization with MSSA: 3/5 patients<br><br>No co-infection with <i>P. aeruginosa</i> and/or <i>B. cepacia</i>                          | ST22, ST247, ST8, ST291, ST72                                                                                | Respiratory cultures | 2-year prospective study: Feb. 2005 to Oct. 2007 | CV                                        | NA                                                                                                                                                                         | [58] |
| x: 22.1 y [2-52] y                  | M: 16<br>F: 19                | Co-colonization with <i>Sa</i> of different STs: 2/35 patients<br><br>Chronic colonization with <i>P. aeruginosa</i> : 21/35 patients      | ST5 (32), ST8 (19), ST30 (3), ST34 (1), ST572 (3), ST4782 (1), ST4886 (1), ST5828 (1), ST5829 (1), ST239 (1) | Sputum               | 2007 to 2016                                     | BRT® and BioFlux™ 200 microfluidic system | NA                                                                                                                                                                         | [40] |
| NA                                  | NA                            | NA                                                                                                                                         | NA                                                                                                           | Lung                 | NA                                               | Continuous -flow culture bioreactors      | NA                                                                                                                                                                         | [60] |
| x: 19 y [17-22] y                   | NA                            | <i>P. aeruginosa</i> : 2/3 patients                                                                                                        | ST8 (2), ST15 (2), ST5 (2)                                                                                   | Airway secretions    | 2008 to 2017                                     | CV                                        | Mutation in the <i>fakA</i> gene and in the <i>saeR</i> gene (up-regulation of SdrD adhesin)<br><br>Down-regulation of the <i>agr</i> regulon (overexpression of adhesins) | [61] |

Table S1 - Cont.

| CF patients                         |                               |                                     | <i>S. aureus</i> strains                                                                                                                                                                         |                                                                       |                                       | Biofilm formation                    |                                                                                                                                                                                         | Ref. |
|-------------------------------------|-------------------------------|-------------------------------------|--------------------------------------------------------------------------------------------------------------------------------------------------------------------------------------------------|-----------------------------------------------------------------------|---------------------------------------|--------------------------------------|-----------------------------------------------------------------------------------------------------------------------------------------------------------------------------------------|------|
| Mean (x) or median (Me) age [range] | Gender male (M) or female (F) | Other infecting species             | Sequence types (ST) or <i>spa</i> typing (n)                                                                                                                                                     | Specimens                                                             | Period of <i>S. aureus</i> collection | Method of study of biofilm formation | Molecular mechanism(s) involved in biofilm formation                                                                                                                                    |      |
| NA                                  | NA                            | NA                                  | t034 (4), t011 (2), t003 (2), t010 (2), t548 (2), t617 (2), t080 (2), t002 (2)                                                                                                                   | Sputum<br>Throat swabs                                                | 1994 to 2017                          | CV                                   | NA                                                                                                                                                                                      | [62] |
| x: 9.7±1.2 y                        | NA                            | <i>P. aeruginosa</i>                | t008 (36), t002 (29), t967 (1), t211 (2), t105 (1), t242 (4), t148 (1), t324 (2), t094 (1), t688 (2), t509 (1), t895 (2), t062 (2), t1577 (2), t304 (1), t024 (3), t216 (2), t1183 (2), t622 (4) | Oropharyngeal swabs (52)<br>Sputum (41)<br>Bronchoalveolar lavage (5) | 2006 to 2014                          | CV                                   | NA                                                                                                                                                                                      | [63] |
| x: 21.8 y<br>[6.3–42.3] y           | NA                            | <i>P. aeruginosa</i>                | ST1 (4), ST5 (4), ST7 (2), ST8 (4), ST15 (10), ST25 (4), ST26 (2), ST30 (10), ST34 (2), ST45 (2), ST101 (6), ST398 (4), ST509 (2), ST619 (2)                                                     | Sputum                                                                | since 1994...                         | CV                                   | NA                                                                                                                                                                                      | [64] |
| Me: 24 y<br>[5–34] y                | M: 7<br>F: 1                  | <i>P. aeruginosa</i> : 3/8 patients | ST25, ST188, ST5, ST30, ST7, ST1909                                                                                                                                                              | Nasal<br>Throat<br>Sputum                                             | NA                                    | CV /<br>confocal<br>microscopy       | 5bp-deletion (TATTT) between <i>icaR</i> and <i>icaA</i> affecting binding of repressor of biofilm (rob)<br><br>Not all strains with 5 bp-deletion were mucoid (compensatory mutations) | [65] |

Table S1 - Cont.

| CF patients                                                     |                                                            |                                                                       | <i>S. aureus</i> strains                                                                                                                                                                |                  |                                                | Biofilm formation                    |                                                                                                                                                                                                                                                  | Ref. |
|-----------------------------------------------------------------|------------------------------------------------------------|-----------------------------------------------------------------------|-----------------------------------------------------------------------------------------------------------------------------------------------------------------------------------------|------------------|------------------------------------------------|--------------------------------------|--------------------------------------------------------------------------------------------------------------------------------------------------------------------------------------------------------------------------------------------------|------|
| Mean (x) or median (Me) age [range]                             | Gender male (M) or female (F)                              | Other infecting species                                               | Sequence types (ST) or <i>spa</i> typing (n)                                                                                                                                            | Specimens        | Period of <i>S. aureus</i> collection          | Method of study of biofilm formation | Molecular mechanism(s) involved in biofilm formation                                                                                                                                                                                             |      |
| <u>Patients with mucoid isolates:</u><br>Me: 29 y [14-39] y     | <u>Patients with mucoid isolates:</u><br>M: 5<br>F: 2      | <i>P. aeruginosa</i> : 4/7<br>Patients with mucoid isolates and 24/74 | <u>Mucoid isolates:</u><br>t493, t189, t002, t267, t091, t893, t618                                                                                                                     | Throat<br>Sputum | Beginning of March 2017 to the end of May 2017 | CV                                   | Not all mucoid strains carried 5 bp-deletion                                                                                                                                                                                                     | [66] |
| <u>Patients without mucoid isolates:</u><br>Me: 17 y [9-24.5] y | <u>Patients without mucoid isolates:</u><br>M: 36<br>F: 38 | Patients without mucoid isolates                                      | <u>Non-mucoid isolates:</u><br>t091, t189, t002, t267, t091, t003, t011                                                                                                                 |                  |                                                |                                      | Not all mucoid strains were biofilm producers                                                                                                                                                                                                    |      |
| Me: 9.5 y                                                       | NA                                                         | NA                                                                    | ST5 (7), ST8 (5), ST12 (2), ST15 (3), ST30 (7), ST45 (2), ST59 (4), ST83 (1), ST87 (2), ST121 (1), ST149 (1), ST221 (1), ST225 (2), ST461 (1), ST1159 (2), ST1498 (1), not typeable (8) | Sputum<br>Throat | NA                                             | CV                                   | Cobalt transporter ATP binding domain ( <i>cbiO</i> ): required for biofilm formation<br><br>Copper ions (Cu <sup>2+</sup> ): cofactors to mediate biofilm formation<br><br>Iron ions (Fe <sup>3+</sup> ): decreased the ability to form biofilm | [67] |
| Paediatric patients                                             | NA                                                         | NA                                                                    | NA                                                                                                                                                                                      | NA               | NA                                             | CV                                   | Sub-inhibitory concentrations of bile (sodium cholate and sodium deoxycholate bile acids) enhanced biofilm formation                                                                                                                             | [68] |

Table S1 - Cont.

| CF patients                         |                               |                                                                                                  | <i>S. aureus</i> strains                     |                                           |                                       | Biofilm formation                    |                                                                                                                                                                                                                                                           | Ref. |
|-------------------------------------|-------------------------------|--------------------------------------------------------------------------------------------------|----------------------------------------------|-------------------------------------------|---------------------------------------|--------------------------------------|-----------------------------------------------------------------------------------------------------------------------------------------------------------------------------------------------------------------------------------------------------------|------|
| Mean (x) or median (Me) age [range] | Gender male (M) or female (F) | Other infecting species                                                                          | Sequence types (ST) or <i>spa</i> typing (n) | Specimens                                 | Period of <i>S. aureus</i> collection | Method of study of biofilm formation | Molecular mechanism(s) involved in biofilm formation                                                                                                                                                                                                      |      |
| x: 37.7 y<br>[27-45] y              | M: 2<br>F: 1                  | <i>P. aeruginosa</i> , MSSA,<br><i>H. parainfluenzae</i> , <i>H. influenzae</i> , <i>E. coli</i> | ST105 (6), ST109 (3),<br>ST5 (3)             | Sputum<br>Blood<br>Bronchoalveolar lavage | 2013 to 2017                          | CV                                   | Mutations and altered expression of <i>dacA</i> and <i>gpdP</i> genes:<br><i>dacA</i> encodes a deadenylate cyclase required for the synthesis of cyclic-di-AMP (c-di-AMP)<br><i>gpdP</i> encodes a phosphodiesterase responsible for c-di-AMP hydrolysis | [69] |
|                                     |                               |                                                                                                  |                                              |                                           |                                       |                                      | Mutations in <i>saeR</i>                                                                                                                                                                                                                                  |      |
|                                     |                               |                                                                                                  |                                              |                                           |                                       |                                      | Increased expression of <i>gapR</i> , <i>zwf</i> , <i>sdh</i> and <i>mgo1</i>                                                                                                                                                                             |      |
|                                     |                               |                                                                                                  |                                              |                                           |                                       |                                      | Decreased expression of <i>gltA</i>                                                                                                                                                                                                                       |      |
|                                     |                               |                                                                                                  |                                              |                                           |                                       |                                      | Increase in <i>fumC</i> expression +++ (malate dehydratase increasing fumarate concentrations)                                                                                                                                                            |      |

CV: crystal violet staining (w/v); MSSA: methicillin-susceptible *Staphylococcus aureus* (*Sa*); NA: not available; SCV: small colony variant; y: years; BRT®: BioFilm Ring test®; fakA: fatty acid kinase A gene; *saeR*: *Staphylococcus* exoprotein expression protein R gene.
